# Supplementary material for: Clinical characteristics and vaccine effectiveness against SARS-CoV-2 Omicron subvariant BA.2 in the children
Source: PubMed Central journal article supplement (PMC9240082; doi:10.1038/s41392-022-01023-w), 2022-06-28

## 深圳市第三人民医院科研项目伦理审查意见书

受理号：深圳三医伦审科研申报字[2020-（013）]号

|                  |                                                                                                                                                                                                                                                                                                                                                                                                                                                                                                                                                                                                                                                                                                                                                                                                                                   |      |           |
|------------------|-----------------------------------------------------------------------------------------------------------------------------------------------------------------------------------------------------------------------------------------------------------------------------------------------------------------------------------------------------------------------------------------------------------------------------------------------------------------------------------------------------------------------------------------------------------------------------------------------------------------------------------------------------------------------------------------------------------------------------------------------------------------------------------------------------------------------------------|------|-----------|
| 项目名称             | 新型冠状病毒感染肺炎临床诊疗标准研究                                                                                                                                                                                                                                                                                                                                                                                                                                                                                                                                                                                                                                                                                                                                                                                                                |      |           |
| 申请类型             | 深圳市科创委                                                                                                                                                                                                                                                                                                                                                                                                                                                                                                                                                                                                                                                                                                                                                                                                                            |      |           |
| 申请科室             | 感染科                                                                                                                                                                                                                                                                                                                                                                                                                                                                                                                                                                                                                                                                                                                                                                                                                               | 申请人  | 刘映霞       |
| 审查方式             | 快速审查                                                                                                                                                                                                                                                                                                                                                                                                                                                                                                                                                                                                                                                                                                                                                                                                                              | 审查时间 | 2020年2月3日 |
| 审<br>查<br>意<br>见 | <p>1.根据世界卫生组织、国家药品监督管理局、广东省药学会等发布的最新版的《中华人民共和国药品管理法》，《药品临床试验管理规范》，《生物医学研究审查伦理委员会操作指南》，《人体生物医学研究国际伦理指南》，《药物临床试验机构伦理委员会操作规程》，《药物临床试验伦理审查工作指导原则》，《药物临床研究伦理审查管理规范》，《医疗器械注册管理办法》，《影像医疗器械临床试验实用手册》，《药物临床试验质量管理规范》，《医疗器械临床试验质量管理规范》，《涉及人的生物医学研究伦理审查办法》，《体外诊断试剂注册管理办法》，《药物临床试验广东共识》，《医疗器械监督管理条例》，《医疗器械临床试验规定》，《实验动物管理条例》（2017年修订版）、《关于善待实验动物指导性意见》、《实验动物 福利伦理审查指南》和《实验动物 动物实验通用要求》等规定和要求</p> <p>经审查，综合评价，意见如下：</p> <p style="margin-left: 20px;"> <input checked="" type="checkbox"/>同意                      <input type="checkbox"/>作必要的修正后同意                      <input type="checkbox"/>作必要的修正后重申<br/> <input type="checkbox"/>不同意                      <input type="checkbox"/>终止或暂停已经批准的临床试验                 </p> <p style="margin-left: 20px;">其他具体意见：</p> <p>2.课题立项后一月内需到伦理委员会备案，递交相关材料，进行伦理评审后获得伦理批件，便于伦理委员会对该项目质量、进展进行监督管理。</p> |      |           |
|                  | 深圳市第三人民医院医学伦理委员会<br><br>主审委员（签名）：<br>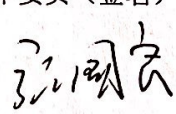<br><br>主任/副主任委员（签名）：<br><br><br>2020年2月4日                                                                                                                                                                                                                                                                                                                                                                                                                                                                                     |      |           |

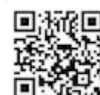

Supplement: 41392_2022_1023_MOESM2_ESM.pdf [file 41392_2022_1023_MOESM2_ESM.pdf]
